# Supplementary material
Source: Research Square preprint supplement (doi:10.21203/rs.3.rs-9715984/v1)
Supplement: Supplementary file 1 [file 49c590a78531f877966801c9.pdf]

Manizales, 24 de agosto de 2023

Señores  
Universidad Autónoma de Manizales  
Programa Estancias con Propósito  
Caldas

Asunto: Aval institucional participación del Programa Estancias con Propósito

Cordial saludo;

Yo Edgar Alberto Hernández B. identificado con cédula de ciudadanía 75.048.943  
como directivo docente de la Institución Educativa: Liceo "Claudina Munera"  
del municipio: Aguadas.

Autorizo a los docentes:

| Nombre del docente                 | Numero de cedula     |
|------------------------------------|----------------------|
| <u>Jaime Eduardo Londoño Rubio</u> | <u>1.053.785.702</u> |

Para que establezca relaciones con ustedes de apoyo financiero y pedagógico y de esta forma se apoya al docente y al grupo de investigación para que participen en las actividades propias del programa; que van desde la dedicación de horas de clase o extracurriculares a la investigación (mínimo dos a la semana), la asistencia a asesorías, talleres disciplinares y encuentros. Así mismo, velar por el debido cumplimiento de los compromisos pedagógicos y administrativos. Expreso que conozco que, si se requiere, se le asigna un presupuesto al grupo de investigación para el desarrollo de sus actividades.

Atentamente;

  
Rector



|                                                   |                                                 |
|---------------------------------------------------|-------------------------------------------------|
| CESION DE DERECHOS DE IMAGEN PARA MENORES DE EDAD | Código: OD-FOR- 21                              |
|                                                   | Versión: 1                                      |
|                                                   | Fecha de aprobación: Enero 2020                 |
| Elaboró formato: CP: Andreina López Rudas         | Aprobó formato: CA: Claudia María Agudelo Vélez |

Fecha:

Yo María Gladys Toro Flores identificado (a) con cédula de ciudadanía N° 20367690 de Agudelo como adulto responsable autorizó que usen las imágenes de María Tatiana García Toro de 17 años de edad, en calidad de participante en ondas a celebrarse en Agudelo, Caldas el día 11 de abril de 2020, para difusión, publicación y promoción del evento Manifiesto haber sido informado(a) previamente del uso que se dará de dicho material. Además autorizo que el programa sea emitido las veces que lo requieran los canales que lo emitan.

Firma con huella

Gladys Toro F.  
c.c 20367690

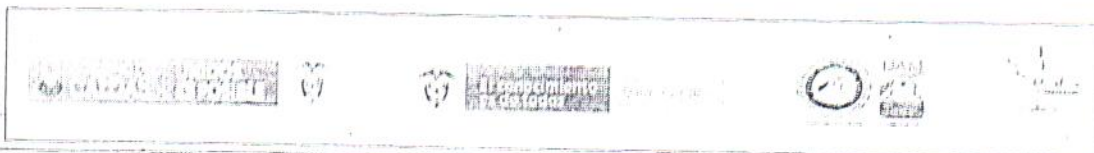

|                                                   |                                                 |
|---------------------------------------------------|-------------------------------------------------|
| CESION DE DERECHOS DE IMAGEN PARA MENORES DE EDAD | Código: OD-FOR- 21                              |
|                                                   | Versión: 1                                      |
|                                                   | Fecha de aprobación: Enero 2020                 |
| Elaboró formato: CP: Andreina López Rudas         | Aprobó formato: CA: Claudia María Agudelo Vélez |

Fecha:

Yo Diana Patricia Arias Arias identificado (a) con cédula de ciudadanía N° 24.373.274 de Aguadas como adulto responsable autorizó que usen las imágenes de Stiven Santiago Valencia Arias de 16 años de edad, en calidad de participante en \_\_\_\_\_ a celebrarse en \_\_\_\_\_, Caldas el día 11 de abril de 2024, para difusión, publicación y promoción del evento \_\_\_\_\_. Manifiesto haber sido informado(a) previamente del uso que se dará de dicho material. Además autorizo que el programa sea emitido las veces que lo requieran los canales que lo emitan

Firma con huella

Diana Patricia Arias Arias  
C.C 24.373.274

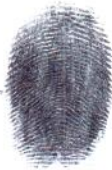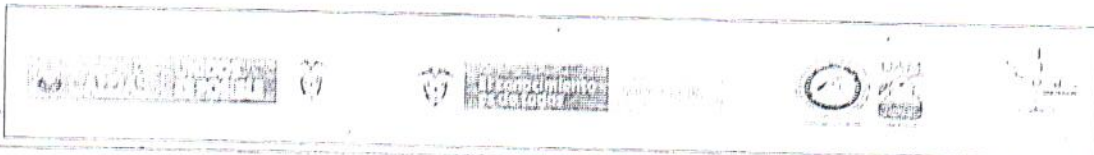

|                                                   |                                                 |
|---------------------------------------------------|-------------------------------------------------|
| CESION DE DERECHOS DE IMAGEN PARA MENORES DE EDAD | Código: OD-FOR- 21                              |
|                                                   | Versión: 1                                      |
|                                                   | Fecha de aprobación: Enero 2020                 |
| Elaboró formato: CP: Andreina López Rudas         | Aprobó formato: CA: Claudia María Agudelo Vélez |

Fecha:

Yo Luz Mary Ballesteros Betancur identificado (a) con cédula de ciudadanía N° 1055839314 de Manizales como adulto responsable autorizó que usen las imágenes de Andrés David Suárez de 17 años de edad, en calidad de participante en \_\_\_\_\_ a celebrarse en \_\_\_\_\_, Caldas el día 11 Abril de 2024, para difusión, publicación y promoción del evento \_\_\_\_\_. Manifiesto haber sido informado(a) previamente del uso que se dará de dicho material. Además autorizo que el programa sea emitido las veces que lo requieran los canales que lo emitan.

Firma con huella

Luz Mary Ballesteros  
C.C. 1055 839 314.

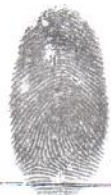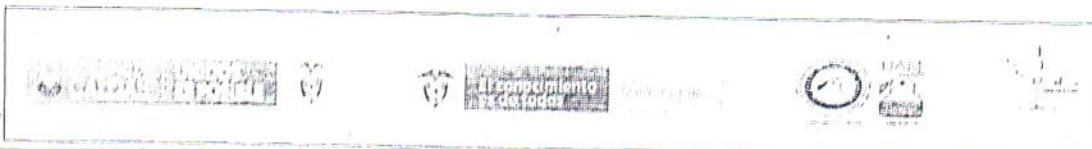

|                                                   |                                                 |
|---------------------------------------------------|-------------------------------------------------|
| CESION DE DERECHOS DE IMAGEN PARA MENORES DE EDAD | Código: OD-FOR- 21                              |
|                                                   | Versión: 1                                      |
|                                                   | Fecha de aprobación: Enero 2020                 |
| Elaboró formato: CP: Andreina López Rudas         | Aprobó formato: CA: Claudia María Agudelo Vélez |

Fecha:

Yo Luz Idalba Valencia Arias identificado (a) con cédula de ciudadanía N° 24370650 de Aguadas como adulto responsable autorizó que usen las imágenes de Jennifer Tatiana Borrero de 15 años de edad, en calidad de participante en Ondas a celebrarse en Aguadas, Caldas el día 11 de abril de 2024, para difusión, publicación y promoción del evento \_\_\_\_\_. Manifiesto haber sido informado(a) previamente del uso que se dará de dicho material. Además autorizo que el programa sea emitido las veces que lo requieran los canales que lo emitan.

Firma con huella

*Luz Idalba Valencia*  
C.C 24370650

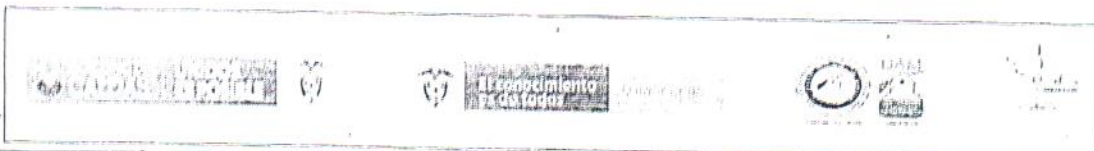

|                                                   |                                                 |
|---------------------------------------------------|-------------------------------------------------|
| CESION DE DERECHOS DE IMAGEN PARA MENORES DE EDAD | Código: OD-FØR-21                               |
|                                                   | Versión: 1                                      |
|                                                   | Fecha de aprobación: Enero 2020                 |
| Elaboró formato: CP: Andreina López Rudas         | Aprobó formato: CA: Claudia María Agudelo Vélez |

Fecha:

Yo Nancy Marulanda G identificado (a) con cédula de ciudadanía N° 24367894 de Aguadas como adulto responsable autorizó que usen las imágenes de Duvan Alexis Sanchez M. de 15 años de edad, en calidad de participante en ondas a celebrarse en Aguadas, Caldas el día 11 de abril de 2020, para difusión, publicación y promoción del evento \_\_\_\_\_. Manifiesto haber sido informado(a) previamente del uso que se dará de dicho material. Además autorizo que el programa sea emitido las veces que lo requieran los canales que lo emitan.

Firma con huella

Nancy Marulanda  
C.C. 24367894

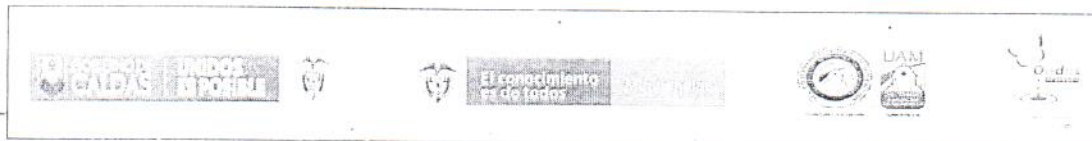



|                                                   |                                                 |
|---------------------------------------------------|-------------------------------------------------|
| CESION DE DERECHOS DE IMAGEN PARA MENORES DE EDAD | Código: OD-FOR- 21                              |
|                                                   | Versión: 1                                      |
|                                                   | Fecha de aprobación: Enero 2020                 |
| Elaboró formato: CP: Andreina López Rudas         | Aprobó formato: CA: Claudia María Agudelo Vélez |

Fecha: 10/04/24

Yo Arelys Nieto Armas identificado (a) con cédula de ciudadanía N° 24 369 510 de Aguadas como adulto responsable autorizó que usen las imágenes de Karen Tatiana Franco Nieto de 15 años de edad, en calidad de participante en grupo ondas a celebrarse en Aguadas, Caldas el día \_\_\_\_\_ de 2024, para difusión, publicación y promoción del evento \_\_\_\_\_. Manifiesto haber sido informado(a) previamente del uso que se dará de dicho material. Además autorizo que el programa sea emitido las veces que lo requieran los canales que lo emitan.

Firma con huella

Arelys Nieto Armas  
C.C. 24 369 510

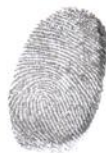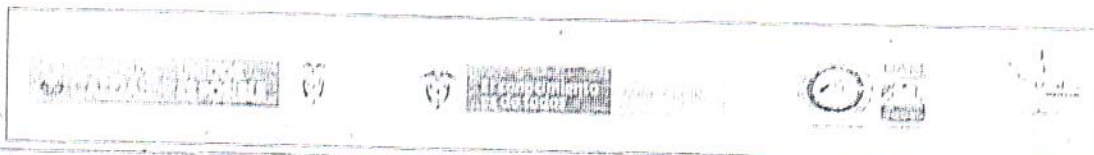

|                                                   |                                                 |
|---------------------------------------------------|-------------------------------------------------|
| CESION DE DERECHOS DE IMAGEN PARA MENORES DE EDAD | Código: OD-FOR- 21                              |
|                                                   | Versión: 1                                      |
|                                                   | Fecha de aprobación: Enero 2020                 |
| Elaboró formato: CP: Andreina López Rudas         | Aprobó formato: CA: Claudia María Agudelo Vélez |

Fecha: 10/04/2024

Yo Viviana Orozco Atehortua identificado (a) con cédula de ciudadanía N° 1055832481 de Aguadas C. como adulto responsable autorizó que usen las imágenes de Juan Alejandro Orozco de 15 años de edad, en calidad de participante en \_\_\_\_\_ a celebrarse en Aguadas, Caldas el día 11 de Abril de 2024, para difusión, publicación y promoción del evento \_\_\_\_\_. Manifiesto haber sido informado(a) previamente del uso que se dará de dicho material. Además autorizo que el programa sea emitido las veces que lo requieran los canales que lo emitan.

Firma con huella

Viviana Orozco A.  
C.C 1055832481

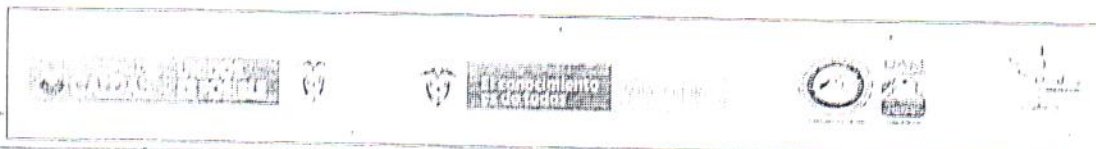

|                                                   |                                                 |
|---------------------------------------------------|-------------------------------------------------|
| CESION DE DERECHOS DE IMAGEN PARA MENORES DE EDAD | Código: OD-FOR- 21                              |
|                                                   | Versión: 1                                      |
|                                                   | Fecha de aprobación: Enero 2020                 |
| Elaboró formato: CP: Andreina López Rudas         | Aprobó formato: CA: Claudia María Agudelo Vélez |

Fecha: 10 - Abril - 2024

Yo Diana Marcela Giraldo Franco identificado (a) con cédula de ciudadanía N° 1055830.479 de Aguadas caldas como adulto responsable autorizó que usen las imágenes de Isabela Carmona Giraldo de 15 años de edad, en calidad de participante en Ondas a celebrarse en Aguadas, Caldas el día \_\_\_\_\_ de 2024, para difusión, publicación y promoción del evento \_\_\_\_\_. Manifiesto haber sido informado(a) previamente del uso que se dará de dicho material. Además autorizo que el programa sea emitido las veces que lo requieran los canales que lo emitan.

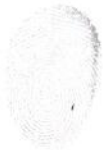

Firma con huella

Diana Marcela Giraldo Franco  
C.C 1055830.479

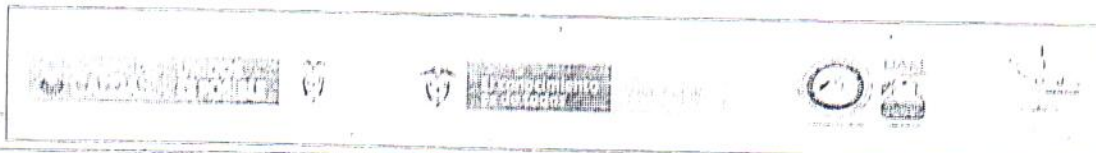

|                                                                                   |                                                                                          |                                              |
|-----------------------------------------------------------------------------------|------------------------------------------------------------------------------------------|----------------------------------------------|
|  | <b>AUTORIZACIÓN PARA EL USO DE MATERIAL AUDIOVISUAL PARA PUBLICACIONES EDITORIAL UAM</b> | CÓDIGO: GIN-FOR-023                          |
|                                                                                   |                                                                                          | VERSIÓN: 4                                   |
|                                                                                   |                                                                                          | FECHA ELABORACIÓN DEL DOCUMENTO: 23/SEP/2020 |

**AUTORIZACIÓN PARA EL USO DE MATERIAL AUDIOVISUAL POR LA UNIVERSIDAD AUTÓNOMA DE MANIZALES**

Yo, Ana Maria Zapata Nieto, mayor de edad, identificado con la cédula de ciudadanía No. 1055833105 de Aguadas, en uso de mis plenas facultades, autorizo irrevocablemente a la UAM para que use material de mi propiedad (y, de ser necesario, realice la correspondiente edición), para los exclusivos efectos de emitir, publicar, divulgar y promocionar, en cualquier lugar del mundo el material indicado a continuación:

|                                                          |                                                           |                                                                     |                                                                     |
|----------------------------------------------------------|-----------------------------------------------------------|---------------------------------------------------------------------|---------------------------------------------------------------------|
| <input checked="" type="checkbox"/> Nombre               | <input checked="" type="checkbox"/> Imagen                | <input checked="" type="checkbox"/> Frases                          | <input checked="" type="checkbox"/> Declaraciones testimoniales     |
| <input checked="" type="checkbox"/> Retrato fotográfico  | <input checked="" type="checkbox"/> Locación              | <input checked="" type="checkbox"/> Pintura                         | <input checked="" type="checkbox"/> Obra de arte                    |
| <input checked="" type="checkbox"/> Litografía           | <input checked="" type="checkbox"/> Mapa                  | <input checked="" type="checkbox"/> Archivos de museo o colecciones | <input checked="" type="checkbox"/> Imágenes de archivo audiovisual |
| <input checked="" type="checkbox"/> Fotografías          | <input checked="" type="checkbox"/> Obra musical original | <input checked="" type="checkbox"/> Derechos de autor               | <input checked="" type="checkbox"/> Composición                     |
| <input checked="" type="checkbox"/> Intérprete           | <input checked="" type="checkbox"/> Producción musical    | <input checked="" type="checkbox"/> Edición musical                 | <input checked="" type="checkbox"/> Producto radiofónico            |
| <input checked="" type="checkbox"/> Contenidos virtuales |                                                           |                                                                     |                                                                     |

Manifiesto que esta autorización la otorgo con carácter gratuito, por lo que entiendo que no recibiré ningún tipo de compensación, bonificación o pago de ninguna naturaleza. Reconozco, además, que no existe ninguna expectativa sobre los eventuales efectos económicos de la divulgación o sobre el tipo de campaña publicitaria que pueda realizarse a nombre de la UAM, ya sea de material científico, académico, cultural o publicitario.

Declaro que conozco que el propósito de dicho material es difundir la Ciencia Tecnología e Innovación que se produce en la UAM para la *Apropiación Social del Conocimiento*.

Atentamente,

Ana Maria Zapata Nieto - 1055833105

C.C.

Fecha: 25/09/2023

Nota: En caso de aparición de personas menores de edad, firma el acudiente.

Acudiente de Estefania Rios Zapata Edad: 15 T.I. 1055833036

|                                                                                  |                                                                                          |                                              |
|----------------------------------------------------------------------------------|------------------------------------------------------------------------------------------|----------------------------------------------|
|  | <b>AUTORIZACIÓN PARA EL USO DE MATERIAL AUDIOVISUAL PARA PUBLICACIONES EDITORIAL UAM</b> | CÓDIGO: GIN-FOR-023                          |
|                                                                                  |                                                                                          | VERSIÓN: 4                                   |
|                                                                                  |                                                                                          | FECHA ELABORACIÓN DEL DOCUMENTO: 23/SEP/2020 |

**AUTORIZACIÓN PARA EL USO DE MATERIAL AUDIOVISUAL POR LA UNIVERSIDAD AUTÓNOMA DE MANIZALES**

Yo, Luz Adicla Patiño Romero, mayor de edad, identificado con la cédula de ciudadanía No. 24372346 de Aguadas, en uso de mis plenas facultades, autorizo irrevocablemente a la UAM para que use material de mi propiedad (y, de ser necesario, realice la correspondiente edición), para los exclusivos efectos de emitir, publicar, divulgar y promocionar, en cualquier lugar del mundo el material indicado a continuación:

|                                                          |                                                           |                                                                     |                                                                     |
|----------------------------------------------------------|-----------------------------------------------------------|---------------------------------------------------------------------|---------------------------------------------------------------------|
| <input checked="" type="checkbox"/> Nombre               | <input checked="" type="checkbox"/> Imagen                | <input checked="" type="checkbox"/> Frases                          | <input checked="" type="checkbox"/> Declaraciones testimoniales     |
| <input checked="" type="checkbox"/> Retrato fotográfico  | <input checked="" type="checkbox"/> Locación              | <input checked="" type="checkbox"/> Pintura                         | <input checked="" type="checkbox"/> Obra de arte                    |
| <input checked="" type="checkbox"/> Litografía           | <input checked="" type="checkbox"/> Mapa                  | <input checked="" type="checkbox"/> Archivos de museo o colecciones | <input checked="" type="checkbox"/> Imágenes de archivo audiovisual |
| <input checked="" type="checkbox"/> Fotografías          | <input checked="" type="checkbox"/> Obra musical original | <input checked="" type="checkbox"/> Derechos de autor               | <input checked="" type="checkbox"/> Composición                     |
| <input checked="" type="checkbox"/> Intérprete           | <input checked="" type="checkbox"/> Producción musical    | <input checked="" type="checkbox"/> Edición musical                 | <input checked="" type="checkbox"/> Producto radiofónico            |
| <input checked="" type="checkbox"/> Contenidos virtuales |                                                           |                                                                     |                                                                     |

Manifiesto que esta autorización la otorgo con carácter gratuito, por lo que entiendo que no recibiré ningún tipo de compensación, bonificación o pago de ninguna naturaleza. Reconozco, además, que no existe ninguna expectativa sobre los eventuales efectos económicos de la divulgación o sobre el tipo de campaña publicitaria que pueda realizarse a nombre de la UAM, ya sea de material científico, académico, cultural o publicitario.

Declaro que conozco que el propósito de dicho material es difundir la Ciencia Tecnología e Innovación que se produce en la UAM para la *Apropiación Social del Conocimiento*.

Atentamente,

Luz Adicla Patiño Romero

C.C. 24372346

Fecha:

Nota: En caso de aparición de personas menores de edad, firma el acudiente.

Acudiente de Anny Danyana Jimenez P. Edad: 15 T.I. 1055833296

|                                                                                  |                                                                                          |                                              |
|----------------------------------------------------------------------------------|------------------------------------------------------------------------------------------|----------------------------------------------|
|  | <b>AUTORIZACIÓN PARA EL USO DE MATERIAL AUDIOVISUAL PARA PUBLICACIONES EDITORIAL UAM</b> | CÓDIGO: GIN-FOR-023                          |
|                                                                                  |                                                                                          | VERSIÓN: 4                                   |
|                                                                                  |                                                                                          | FECHA ELABORACIÓN DEL DOCUMENTO: 23/SEP/2020 |

**AUTORIZACIÓN PARA EL USO DE MATERIAL AUDIOVISUAL POR LA UNIVERSIDAD AUTÓNOMA DE MANIZALES**

Yo, Loz Amparo Rodríguez Valencia, mayor de edad, identificado con la cédula de ciudadanía No. 24372440 de Aguadas, en uso de mis plenas facultades, autorizo irrevocablemente a la UAM para que use material de mi propiedad (y, de ser necesario, realice la correspondiente edición), para los exclusivos efectos de emitir, publicar, divulgar y promocionar, en cualquier lugar del mundo el material indicado a continuación:

|                                                          |                                                           |                                                                     |                                                                     |
|----------------------------------------------------------|-----------------------------------------------------------|---------------------------------------------------------------------|---------------------------------------------------------------------|
| <input checked="" type="checkbox"/> Nombre               | <input checked="" type="checkbox"/> Imagen                | <input checked="" type="checkbox"/> Frases                          | <input checked="" type="checkbox"/> Declaraciones testimoniales     |
| <input checked="" type="checkbox"/> Retrato fotográfico  | <input checked="" type="checkbox"/> Locación              | <input checked="" type="checkbox"/> Pintura                         | <input checked="" type="checkbox"/> Obra de arte                    |
| <input checked="" type="checkbox"/> Litografía           | <input checked="" type="checkbox"/> Mapa                  | <input checked="" type="checkbox"/> Archivos de museo o colecciones | <input checked="" type="checkbox"/> Imágenes de archivo audiovisual |
| <input checked="" type="checkbox"/> Fotografías          | <input checked="" type="checkbox"/> Obra musical original | <input checked="" type="checkbox"/> Derechos de autor               | <input checked="" type="checkbox"/> Composición                     |
| <input checked="" type="checkbox"/> Intérprete           | <input checked="" type="checkbox"/> Producción musical    | <input checked="" type="checkbox"/> Edición musical                 | <input checked="" type="checkbox"/> Producto radiofónico            |
| <input checked="" type="checkbox"/> Contenidos virtuales |                                                           |                                                                     |                                                                     |

Manifiesto que esta autorización la otorgo con carácter gratuito, por lo que entiendo que no recibiré ningún tipo de compensación, bonificación o pago de ninguna naturaleza. Reconozco, además, que no existe ninguna expectativa sobre los eventuales efectos económicos de la divulgación o sobre el tipo de campaña publicitaria que pueda realizarse a nombre de la UAM, ya sea de material científico, académico, cultural o publicitario.

Declaro que conozco que el propósito de dicho material es difundir la Ciencia Tecnología e Innovación que se produce en la UAM para la *Apropiación Social del Conocimiento*.

Atentamente,

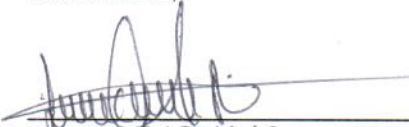  
 c.c. 24372440

Fecha:

Nota: En caso de aparición de personas menores de edad, firma el acudiente.

Acudiente de Marcela Arias Rodríguez Edad: 16 T.I. 1054865136

|                                                                                   |                                                                                          |                                              |
|-----------------------------------------------------------------------------------|------------------------------------------------------------------------------------------|----------------------------------------------|
|  | <b>AUTORIZACIÓN PARA EL USO DE MATERIAL AUDIOVISUAL PARA PUBLICACIONES EDITORIAL UAM</b> | CÓDIGO: GIN-FOR-023                          |
|                                                                                   |                                                                                          | VERSIÓN: 4                                   |
|                                                                                   |                                                                                          | FECHA ELABORACIÓN DEL DOCUMENTO: 23/SEP/2020 |

**AUTORIZACIÓN PARA EL USO DE MATERIAL AUDIOVISUAL POR LA UNIVERSIDAD AUTÓNOMA DE MANIZALES**

Yo, Luz Estela Valencia, mayor de edad, identificado con la cédula de ciudadanía No. 24369909 de Aguadas, en uso de mis plenas facultades, autorizo irrevocablemente a la UAM para que use material de mi propiedad (y, de ser necesario, realice la correspondiente edición), para los exclusivos efectos de emitir, publicar, divulgar y promocionar, en cualquier lugar del mundo el material indicado a continuación:

|                                                          |                                                           |                                                                     |                                                                     |
|----------------------------------------------------------|-----------------------------------------------------------|---------------------------------------------------------------------|---------------------------------------------------------------------|
| <input checked="" type="checkbox"/> Nombre               | <input checked="" type="checkbox"/> Imagen                | <input checked="" type="checkbox"/> Frases                          | <input checked="" type="checkbox"/> Declaraciones testimoniales     |
| <input checked="" type="checkbox"/> Retrato fotográfico  | <input checked="" type="checkbox"/> Locación              | <input checked="" type="checkbox"/> Pintura                         | <input checked="" type="checkbox"/> Obra de arte                    |
| <input checked="" type="checkbox"/> Litografía           | <input checked="" type="checkbox"/> Mapa                  | <input checked="" type="checkbox"/> Archivos de museo o colecciones | <input checked="" type="checkbox"/> Imágenes de archivo audiovisual |
| <input checked="" type="checkbox"/> Fotografías          | <input checked="" type="checkbox"/> Obra musical original | <input checked="" type="checkbox"/> Derechos de autor               | <input checked="" type="checkbox"/> Composición                     |
| <input checked="" type="checkbox"/> Intérprete           | <input checked="" type="checkbox"/> Producción musical    | <input checked="" type="checkbox"/> Edición musical                 | <input checked="" type="checkbox"/> Producto radiofónico            |
| <input checked="" type="checkbox"/> Contenidos virtuales |                                                           |                                                                     |                                                                     |

Manifiesto que esta autorización la otorgo con carácter gratuito, por lo que entiendo que no recibiré ningún tipo de compensación, bonificación o pago de ninguna naturaleza. Reconozco, además, que no existe ninguna expectativa sobre los eventuales efectos económicos de la divulgación o sobre el tipo de campaña publicitaria que pueda realizarse a nombre de la UAM, ya sea de material científico, académico, cultural o publicitario.

Declaro que conozco que el propósito de dicho material es difundir la Ciencia Tecnología e Innovación que se produce en la UAM para la *Apropiación Social del Conocimiento*.

Atentamente,

  
 C.C. 24369909

Fecha:

Nota: En caso de aparición de personas menores de edad, firma el acudiente.

Acudiente de Nallely Franco Valencia Edad: 16 T.I. 1055832825

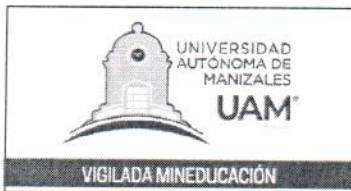

**AUTORIZACIÓN PARA EL USO DE MATERIAL AUDIOVISUAL PARA PUBLICACIONES EDITORIAL UAM**

CÓDIGO: GIN-FOR-023  
 VERSIÓN: 4  
 FECHA ELABORACIÓN DEL DOCUMENTO: 23/SEP/2020

**AUTORIZACIÓN PARA EL USO DE MATERIAL AUDIOVISUAL POR LA UNIVERSIDAD AUTÓNOMA DE MANIZALES**

Yo, Gady Eliana Castaño S, mayor de edad, identificado con la cédula de ciudadanía No. 24372916 de Aguacalá, en uso de mis plenas facultades, autorizo irrevocablemente a la UAM para que use material de mi propiedad (y, de ser necesario, realice la correspondiente edición), para los exclusivos efectos de emitir, publicar, divulgar y promocionar, en cualquier lugar del mundo el material indicado a continuación:

|                                                          |                                                           |                                                                     |                                                                     |
|----------------------------------------------------------|-----------------------------------------------------------|---------------------------------------------------------------------|---------------------------------------------------------------------|
| <input checked="" type="checkbox"/> Nombre               | <input checked="" type="checkbox"/> Imagen                | <input checked="" type="checkbox"/> Frases                          | <input checked="" type="checkbox"/> Declaraciones testimoniales     |
| <input checked="" type="checkbox"/> Retrato fotográfico  | <input checked="" type="checkbox"/> Locación              | <input checked="" type="checkbox"/> Pintura                         | <input checked="" type="checkbox"/> Obra de arte                    |
| <input checked="" type="checkbox"/> Litografía           | <input checked="" type="checkbox"/> Mapa                  | <input checked="" type="checkbox"/> Archivos de museo o colecciones | <input checked="" type="checkbox"/> Imágenes de archivo audiovisual |
| <input checked="" type="checkbox"/> Fotografías          | <input checked="" type="checkbox"/> Obra musical original | <input checked="" type="checkbox"/> Derechos de autor               | <input checked="" type="checkbox"/> Composición                     |
| <input checked="" type="checkbox"/> Intérprete           | <input checked="" type="checkbox"/> Producción musical    | <input checked="" type="checkbox"/> Edición musical                 | <input checked="" type="checkbox"/> Producto radiofónico            |
| <input checked="" type="checkbox"/> Contenidos virtuales |                                                           |                                                                     |                                                                     |

Manifiesto que esta autorización la otorgo con carácter gratuito, por lo que entiendo que no recibiré ningún tipo de compensación, bonificación o pago de ninguna naturaleza. Reconozco, además, que no existe ninguna expectativa sobre los eventuales efectos económicos de la divulgación o sobre el tipo de campaña publicitaria que pueda realizarse a nombre de la UAM, ya sea de material científico, académico, cultural o publicitario.

Declaro que conozco que el propósito de dicho material es difundir la Ciencia Tecnología e Innovación que se produce en la UAM para la *Apropiación Social del Conocimiento*.

Atentamente,

Gady Eliana Castaño

C.C. 24372916

Fecha: 25/Septiembre 2023

Nota: En caso de aparición de personas menores de edad, firma el acudiente.

Acudiente de Ara Sofía López Castaño Edad: 16 T.I. 105832762

|                                                                                  |                                                                                          |                                              |
|----------------------------------------------------------------------------------|------------------------------------------------------------------------------------------|----------------------------------------------|
|  | <b>AUTORIZACIÓN PARA EL USO DE MATERIAL AUDIOVISUAL PARA PUBLICACIONES EDITORIAL UAM</b> | CÓDIGO: GIN-FOR-023                          |
|                                                                                  |                                                                                          | VERSIÓN: 4                                   |
|                                                                                  |                                                                                          | FECHA ELABORACIÓN DEL DOCUMENTO: 23/SEP/2020 |

**AUTORIZACIÓN PARA EL USO DE MATERIAL AUDIOVISUAL POR LA UNIVERSIDAD AUTÓNOMA DE MANIZALES**

Yo, Arelis Nieto Arias, mayor de edad, identificado con la cédula de ciudadanía No. 24369570 de Aguacadó, en uso de mis plenas facultades, autorizo irrevocablemente a la UAM para que use material de mi propiedad (y, de ser necesario, realice la correspondiente edición), para los exclusivos efectos de emitir, publicar, divulgar y promocionar, en cualquier lugar del mundo el material indicado a continuación:

|                                                          |                                                           |                                                                     |                                                                     |
|----------------------------------------------------------|-----------------------------------------------------------|---------------------------------------------------------------------|---------------------------------------------------------------------|
| <input checked="" type="checkbox"/> Nombre               | <input checked="" type="checkbox"/> Imagen                | <input checked="" type="checkbox"/> Frases                          | <input checked="" type="checkbox"/> Declaraciones testimoniales     |
| <input checked="" type="checkbox"/> Retrato fotográfico  | <input checked="" type="checkbox"/> Locación              | <input checked="" type="checkbox"/> Pintura                         | <input checked="" type="checkbox"/> Obra de arte                    |
| <input checked="" type="checkbox"/> Litografía           | <input checked="" type="checkbox"/> Mapa                  | <input checked="" type="checkbox"/> Archivos de museo o colecciones | <input checked="" type="checkbox"/> Imágenes de archivo audiovisual |
| <input checked="" type="checkbox"/> Fotografías          | <input checked="" type="checkbox"/> Obra musical original | <input checked="" type="checkbox"/> Derechos de autor               | <input checked="" type="checkbox"/> Composición                     |
| <input checked="" type="checkbox"/> Intérprete           | <input checked="" type="checkbox"/> Producción musical    | <input checked="" type="checkbox"/> Edición musical                 | <input checked="" type="checkbox"/> Producto radiofónico            |
| <input checked="" type="checkbox"/> Contenidos virtuales |                                                           |                                                                     |                                                                     |

Manifiesto que esta autorización la otorgo con carácter gratuito, por lo que entiendo que no recibiré ningún tipo de compensación, bonificación o pago de ninguna naturaleza. Reconozco, además, que no existe ninguna expectativa sobre los eventuales efectos económicos de la divulgación o sobre el tipo de campaña publicitaria que pueda realizarse a nombre de la UAM, ya sea de material científico, académico, cultural o publicitario.

Declaro que conozco que el propósito de dicho material es difundir la Ciencia Tecnología e Innovación que se produce en la UAM para la *Apropiación Social del Conocimiento*.

Atentamente,

Arelis Nieto Arias

C.C. 24369570

Fecha:

Nota: En caso de aparición de personas menores de edad, firma el acudiente.

Acudiente de Karen Tatiana Franco Nieto Edad: 15 T.I. 1055@33128

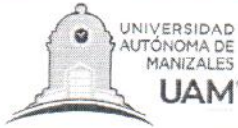

UNIVERSIDAD  
AUTÓNOMA DE  
MANIZALES  
**UAM**

VIGILADA MINEDUCACIÓN

**AUTORIZACIÓN PARA EL USO DE  
MATERIAL AUDIOVISUAL PARA  
PUBLICACIONES EDITORIAL UAM**

CÓDIGO: GIN-FOR-023

VERSIÓN: 4

FECHA ELABORACIÓN DEL  
DOCUMENTO: 23/SEP/2020

**AUTORIZACIÓN PARA EL USO DE MATERIAL AUDIOVISUAL POR LA UNIVERSIDAD  
AUTÓNOMA DE MANIZALES**

Yo, Alba Yordany Loaiza R, mayor de edad, identificado con la cédula de ciudadanía No. 24372941 de Aguadas, en uso de mis plenas facultades, autorizo irrevocablemente a la UAM para que use material de mi propiedad (y, de ser necesario, realice la correspondiente edición), para los exclusivos efectos de emitir, publicar, divulgar y promocionar, en cualquier lugar del mundo el material indicado a continuación:

|                                                          |                                                           |                                                                     |                                                                     |
|----------------------------------------------------------|-----------------------------------------------------------|---------------------------------------------------------------------|---------------------------------------------------------------------|
| <input checked="" type="checkbox"/> Nombre               | <input checked="" type="checkbox"/> Imagen                | <input checked="" type="checkbox"/> Frases                          | <input checked="" type="checkbox"/> Declaraciones testimoniales     |
| <input checked="" type="checkbox"/> Retrato fotográfico  | <input checked="" type="checkbox"/> Locación              | <input checked="" type="checkbox"/> Pintura                         | <input checked="" type="checkbox"/> Obra de arte                    |
| <input checked="" type="checkbox"/> Litografía           | <input checked="" type="checkbox"/> Mapa                  | <input checked="" type="checkbox"/> Archivos de museo o colecciones | <input checked="" type="checkbox"/> Imágenes de archivo audiovisual |
| <input checked="" type="checkbox"/> Fotografías          | <input checked="" type="checkbox"/> Obra musical original | <input checked="" type="checkbox"/> Derechos de autor               | <input checked="" type="checkbox"/> Composición                     |
| <input checked="" type="checkbox"/> Intérprete           | <input checked="" type="checkbox"/> Producción musical    | <input checked="" type="checkbox"/> Edición musical                 | <input checked="" type="checkbox"/> Producto radiofónico            |
| <input checked="" type="checkbox"/> Contenidos virtuales |                                                           |                                                                     |                                                                     |

Manifiesto que esta autorización la otorgo con carácter gratuito, por lo que entiendo que no recibiré ningún tipo de compensación, bonificación o pago de ninguna naturaleza. Reconozco, además, que no existe ninguna expectativa sobre los eventuales efectos económicos de la divulgación o sobre el tipo de campaña publicitaria que pueda realizarse a nombre de la UAM, ya sea de material científico, académico, cultural o publicitario.

Declaro que conozco que el propósito de dicho material es difundir la Ciencia Tecnología e Innovación que se produce en la UAM para la *Apropiación Social del Conocimiento*.

Atentamente,

Alba Yordany Loaiza R

C.C. 24372941

Fecha: 26/09/23

Nota: En caso de aparición de personas menores de edad, firma el acudiente.

Acudiente de Yoane Buitrago Loaiza Edad: 15 T.I. 1054868486

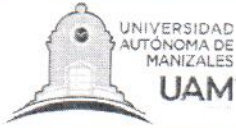

VIGILADA MINEDUCACIÓN

### AUTORIZACIÓN PARA EL USO DE MATERIAL AUDIOVISUAL PARA PUBLICACIONES EDITORIAL UAM

CÓDIGO: GIN-FOR-023

VERSIÓN: 4

FECHA ELABORACIÓN DEL DOCUMENTO: 23/SEP/2020

### AUTORIZACIÓN PARA EL USO DE MATERIAL AUDIOVISUAL POR LA UNIVERSIDAD AUTÓNOMA DE MANIZALES

Yo, Edid Gallego Loaiza, mayor de edad, identificado con la cédula de ciudadanía No. 24368007 de Aguadas, en uso de mis plenas facultades, autorizo irrevocablemente a la UAM para que use material de mi propiedad (y, de ser necesario, realice la correspondiente edición), para los exclusivos efectos de emitir, publicar, divulgar y promocionar, en cualquier lugar del mundo el material indicado a continuación:

|                                                          |                                                           |                                                                     |                                                                     |
|----------------------------------------------------------|-----------------------------------------------------------|---------------------------------------------------------------------|---------------------------------------------------------------------|
| <input checked="" type="checkbox"/> Nombre               | <input checked="" type="checkbox"/> Imagen                | <input checked="" type="checkbox"/> Frases                          | <input checked="" type="checkbox"/> Declaraciones testimoniales     |
| <input checked="" type="checkbox"/> Retrato fotográfico  | <input checked="" type="checkbox"/> Locación              | <input checked="" type="checkbox"/> Pintura                         | <input checked="" type="checkbox"/> Obra de arte                    |
| <input checked="" type="checkbox"/> Litografía           | <input checked="" type="checkbox"/> Mapa                  | <input checked="" type="checkbox"/> Archivos de museo o colecciones | <input checked="" type="checkbox"/> Imágenes de archivo audiovisual |
| <input checked="" type="checkbox"/> Fotografías          | <input checked="" type="checkbox"/> Obra musical original | <input checked="" type="checkbox"/> Derechos de autor               | <input checked="" type="checkbox"/> Composición                     |
| <input checked="" type="checkbox"/> Intérprete           | <input checked="" type="checkbox"/> Producción musical    | <input checked="" type="checkbox"/> Edición musical                 | <input checked="" type="checkbox"/> Producto radiofónico            |
| <input checked="" type="checkbox"/> Contenidos virtuales |                                                           |                                                                     |                                                                     |

Manifiesto que esta autorización la otorgo con carácter gratuito, por lo que entiendo que no recibiré ningún tipo de compensación, bonificación o pago de ninguna naturaleza. Reconozco, además, que no existe ninguna expectativa sobre los eventuales efectos económicos de la divulgación o sobre el tipo de campaña publicitaria que pueda realizarse a nombre de la UAM, ya sea de material científico, académico, cultural o publicitario.

Declaro que conozco que el propósito de dicho material es difundir la Ciencia Tecnología e Innovación que se produce en la UAM para la *Apropiación Social del Conocimiento*.

Atentamente,

C.C.

Fecha:

Nota: En caso de aparición de personas menores de edad, firma el acudiente.

Acudiente de Jaura Sofia Florez Gallego Edad: 15 T.I. 1055833353

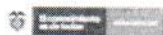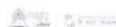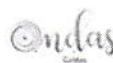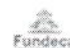

**AUTORIZACIÓN PARA EL USO DE MATERIAL AUDIOVISUAL POR LA UNIVERSIDAD AUTÓNOMA DE MANIZALES**

Yo, Luz Elena Arias C, mayor de edad, identificado con la cédula de ciudadanía No. 24368502 de Aguadas, en uso de mis plenas facultades, autorizo irrevocablemente a la UAM para que use material de mi propiedad (y, de ser necesario, realice la correspondiente edición), para los exclusivos efectos de emitir, publicar, divulgar y promocionar, en cualquier lugar del mundo el material indicado a continuación:

|                                                          |                                                           |                                                                     |                                                                     |
|----------------------------------------------------------|-----------------------------------------------------------|---------------------------------------------------------------------|---------------------------------------------------------------------|
| <input checked="" type="checkbox"/> Nombre               | <input checked="" type="checkbox"/> Imagen                | <input checked="" type="checkbox"/> Frases                          | <input checked="" type="checkbox"/> Declaraciones testimoniales     |
| <input checked="" type="checkbox"/> Retrato fotográfico  | <input checked="" type="checkbox"/> Locación              | <input checked="" type="checkbox"/> Pintura                         | <input checked="" type="checkbox"/> Obra de arte                    |
| <input checked="" type="checkbox"/> Litografía           | <input checked="" type="checkbox"/> Mapa                  | <input checked="" type="checkbox"/> Archivos de museo o colecciones | <input checked="" type="checkbox"/> Imágenes de archivo audiovisual |
| <input checked="" type="checkbox"/> Fotografías          | <input checked="" type="checkbox"/> Obra musical original | <input checked="" type="checkbox"/> Derechos de autor               | <input checked="" type="checkbox"/> Composición                     |
| <input checked="" type="checkbox"/> Intérprete           | <input checked="" type="checkbox"/> Producción musical    | <input checked="" type="checkbox"/> Edición musical                 | <input checked="" type="checkbox"/> Producto radiofónico            |
| <input checked="" type="checkbox"/> Contenidos virtuales |                                                           |                                                                     |                                                                     |

Manifiesto que esta autorización la otorgo con carácter gratuito, por lo que entiendo que no recibiré ningún tipo de compensación, bonificación o pago de ninguna naturaleza. Reconozco, además, que no existe ninguna expectativa sobre los eventuales efectos económicos de la divulgación o sobre el tipo de campaña publicitaria que pueda realizarse a nombre de la UAM, ya sea de material científico, académico, cultural o publicitario.

Declaro que conozco que el propósito de dicho material es difundir la Ciencia Tecnología e Innovación que se produce en la UAM para la *Apropiación Social del Conocimiento*.

Atentamente,

  
 C.C. 24368502  
 Fecha:

Nota: En caso de aparición de personas menores de edad, firma el acudiente.

Acudiente de Mariana Hernández Edad: 14 T.I. 4088006276

**AUTORIZACIÓN PARA EL USO DE MATERIAL AUDIOVISUAL POR LA UNIVERSIDAD AUTÓNOMA DE MANIZALES**

Yo, Dorelba Giraldo Pineda, mayor de edad, identificado con la cédula de ciudadanía No. 43459494 de Sonsón, en uso de mis plenas facultades, autorizo irrevocablemente a la UAM para que use material de mi propiedad (y, de ser necesario, realice la correspondiente edición), para los exclusivos efectos de emitir, publicar, divulgar y promocionar, en cualquier lugar del mundo el material indicado a continuación:

|                                                          |                                                           |                                                                     |                                                                     |
|----------------------------------------------------------|-----------------------------------------------------------|---------------------------------------------------------------------|---------------------------------------------------------------------|
| <input checked="" type="checkbox"/> Nombre               | <input checked="" type="checkbox"/> Imagen                | <input checked="" type="checkbox"/> Frases                          | <input checked="" type="checkbox"/> Declaraciones testimoniales     |
| <input checked="" type="checkbox"/> Retrato fotográfico  | <input checked="" type="checkbox"/> Locación              | <input checked="" type="checkbox"/> Pintura                         | <input checked="" type="checkbox"/> Obra de arte                    |
| <input checked="" type="checkbox"/> Litografía           | <input checked="" type="checkbox"/> Mapa                  | <input checked="" type="checkbox"/> Archivos de museo o colecciones | <input checked="" type="checkbox"/> Imágenes de archivo audiovisual |
| <input checked="" type="checkbox"/> Fotografías          | <input checked="" type="checkbox"/> Obra musical original | <input checked="" type="checkbox"/> Derechos de autor               | <input checked="" type="checkbox"/> Composición                     |
| <input checked="" type="checkbox"/> Intérprete           | <input checked="" type="checkbox"/> Producción musical    | <input checked="" type="checkbox"/> Edición musical                 | <input checked="" type="checkbox"/> Producto radiofónico            |
| <input checked="" type="checkbox"/> Contenidos virtuales |                                                           |                                                                     |                                                                     |

Manifiesto que esta autorización la otorgo con carácter gratuito, por lo que entiendo que no recibiré ningún tipo de compensación, bonificación o pago de ninguna naturaleza. Reconozco, además, que no existe ninguna expectativa sobre los eventuales efectos económicos de la divulgación o sobre el tipo de campaña publicitaria que pueda realizarse a nombre de la UAM, ya sea de material científico, académico, cultural o publicitario.

Declaro que conozco que el propósito de dicho material es difundir la Ciencia Tecnología e Innovación que se produce en la UAM para la *Apropiación Social del Conocimiento*.

Atentamente,

Dorelba Giraldo Pineda

C.C. 43459494

Fecha: 27 Septiembre 2023

Nota: En caso de aparición de personas menores de edad, firma el acudiente.

Acudiente de Yenny Carolina Pineda Edad: 16 T.I. 1055832771
