# Supplementary material
Source: Research Square preprint supplement (doi:10.21203/rs.3.rs-9715984/v1)
Supplement: Supplementary file 2 [file e763ab849667f874cac09804.pdf]

|                                                                                   |                        |                                                     |
|-----------------------------------------------------------------------------------|------------------------|-----------------------------------------------------|
|  | <b>ACTAS DE COMITÉ</b> | <b>CÓDIGO:</b> GIN-FOR-003                          |
|                                                                                   |                        | <b>VERSIÓN:</b> 2                                   |
|                                                                                   |                        | <b>FECHA ELABORACIÓN DEL DOCUMENTO:</b> 09/JUN/2015 |

**VICERRECTORÍA ACADÉMICA  
UNIDAD DE INVESTIGACIÓN  
COMITÉ DE INVESTIGACIÓN  
Acta: 138**

**Fecha:** noviembre 7 de 2023

**Hora:** 14.00 hr -4:00 hr.

**Inicio:** 14.00 hr

Sesión virtual

**Asistentes:**

|                                                                                     |                                                                                                      |
|-------------------------------------------------------------------------------------|------------------------------------------------------------------------------------------------------|
| Carlos Eduardo Jaramillo S.                                                         | Rector<br>Asistió                                                                                    |
| Iván Escobar Escobar                                                                | Vicerrector Académico<br>Se excusó                                                                   |
| Nancy Liliana Mahecha                                                               | Vicerrector Administrativo y Financiero<br>Asistió                                                   |
| Juan Pablo Duque Arbeláez                                                           | Secretario General<br>Se excusó                                                                      |
| Claudia Patricia Henao Lema                                                         | Vicerrectoría de Desarrollo Humano y Bienestar<br>Se excusó                                          |
| María del Carmen Vergara Quintero                                                   | Coordinadora de la Unidad de Investigación<br>Asistió                                                |
| Tania Meckenzie Torres                                                              | Decana de la Facultad de Estudios Sociales y Empresariales<br>Se excusó                              |
| Julio Ernesto Pérez                                                                 | Decano de la Facultad de Salud<br>Se excusó                                                          |
| Oscar Moscoso Londoño                                                               | Decano de la Facultad de Ingenierías<br>Se excusó                                                    |
| Sebastián Durango Idárraga (principal)<br>José Luis Rodríguez (suplente)            | Sebastián Durango Idárraga (principal)<br>Asistió                                                    |
| Angélica María Rodríguez (principal)<br>María Mercedes Suarez (suplente)            | María Mercedes Suarez. (principal). Se excusó<br>Angélica María Rodríguez. Asistió                   |
| José Armando Vidarte Claros (principal)-<br>Brenda Yuliana Herrera Serna (suplente) | José Armando Vidarte Claros (principal). Asistió<br>Brenda Yuliana Herrera Serna (suplente)- Asistió |
| Adriana María Giraldo O.                                                            | Coordinador de la Unidad de Posgrados<br>No Asistió                                                  |

|                                                                                   |                        |                                                     |
|-----------------------------------------------------------------------------------|------------------------|-----------------------------------------------------|
|  | <b>ACTAS DE COMITÉ</b> | <b>CÓDIGO:</b> GIN-FOR-003                          |
|                                                                                   |                        | <b>VERSIÓN:</b> 2                                   |
|                                                                                   |                        | <b>FECHA ELABORACIÓN DEL DOCUMENTO:</b> 09/JUN/2015 |

|                           |                                                                                           |
|---------------------------|-------------------------------------------------------------------------------------------|
| Luz Ángela Velasco E.     | Coordinadora de la Unidad de Enseñanza Aprendizaje<br>Asistió                             |
| Lida Maritza Gil          | Coordinadora de la unidad de Planeación Institucional<br>No asistió                       |
| Bellazmín Arenas Quintana | Coordinadora de la Unidad de Proyección<br>Asistió                                        |
| Alba lucia Paz Delgado    | Coordinadora de la Unidad de Autoevaluación y<br>Acreditación Institucional<br>No asistió |

Se anexa la lista de asistentes

### Agenda de la sesión

1. Lectura del acta 137 (previo envió por correo electrónico)
2. Presentación de proyectos aprobados en los grupos de investigación

| <b>GRUPO Y LÍNEAS</b>                                                                                                                                                                                                                                                                    | <b>TÍTULO DEL PROYECTO</b>                                                                                                                                                                                                       | <b>AUTORES</b>                                                                                                                                                                                                                                                        |
|------------------------------------------------------------------------------------------------------------------------------------------------------------------------------------------------------------------------------------------------------------------------------------------|----------------------------------------------------------------------------------------------------------------------------------------------------------------------------------------------------------------------------------|-----------------------------------------------------------------------------------------------------------------------------------------------------------------------------------------------------------------------------------------------------------------------|
| Salud pública<br>Desarrollo Regional<br>Sostenible<br>Ética y política<br>Empresariado<br>Cognición y educación<br><br>En total 30 grupos de investigación en la alianza.<br><b>Universidades</b><br>Ucaldas<br>Universidad Nacional sede Manizales<br>Universidad Tecnológica del Choco | Reconstrucción del tejido social en zonas de posconflicto en Colombia.<br><br>Colombia científica<br><br>Informe de cierre: 5 años de trabajo colaborativo en el marco de una convocatoria nacional con aliados internacionales. | María Eugenia Arango<br>Gloria Patricia Castrillón<br>Jorge Norvey Álvarez Rios<br>Santiago Quintero<br>Marcela Carvajal<br>Luis Hernando Barreto<br>Adriana Maria Giraldo<br>Lida Maritza Gil<br>María del Carmen Vergara Q<br>Daniel Hurtado Cano<br>Lorena Delgado |

|                                                                                   |                        |                                                     |
|-----------------------------------------------------------------------------------|------------------------|-----------------------------------------------------|
|  | <b>ACTAS DE COMITÉ</b> | <b>CÓDIGO:</b> GIN-FOR-003                          |
|                                                                                   |                        | <b>VERSIÓN:</b> 2                                   |
|                                                                                   |                        | <b>FECHA ELABORACIÓN DEL DOCUMENTO:</b> 09/JUN/2015 |

|                                                                                                                                                                                                                                                               |                                                                                                                                                                    |                                                                                                                                                                                                                                                                                                                                                                                       |
|---------------------------------------------------------------------------------------------------------------------------------------------------------------------------------------------------------------------------------------------------------------|--------------------------------------------------------------------------------------------------------------------------------------------------------------------|---------------------------------------------------------------------------------------------------------------------------------------------------------------------------------------------------------------------------------------------------------------------------------------------------------------------------------------------------------------------------------------|
| <p>Universidad de Sucre<br/> Universidad de Granada<br/> Universidad Strasbourg<br/> CINDE<br/> Codechoco</p>                                                                                                                                                 |                                                                                                                                                                    |                                                                                                                                                                                                                                                                                                                                                                                       |
| <p>Neuroaprendizaje (UAM)<br/> SEAD (UAM)<br/> Cognición y Educación (U. de Caldas)<br/> Psicología del desarrollo (U. de Manizales)</p>                                                                                                                      | <p>Patrones de aprendizaje: relaciones con aspectos individuales y contextuales</p>                                                                                | <p>Investigador: Christian Hederich Martínez<br/> Investigador: Angélica María Rodríguez Ortiz<br/> Investigador: Valentina Cadavid Alzate<br/> Investigador: Diana Marcela Montoya Londoño<br/> Investigador: Gloria del Carmen Tobón Vásquez<br/> Investigador: Juan Camilo Hernández Rodríguez</p>                                                                                 |
| <p>Automática<br/> Física y matemáticas<br/> Financiado por Minciencias</p>                                                                                                                                                                                   | <p>Desarrollo de un sistema de monitoreo y alerta de la calidad del aire y el confort en ambientes escolares</p>                                                   | <p>Investigador Principal: Frank Florez Montes<br/> Coinvestigador 1: Manuel Alejandro Tamayo Monsalve<br/> Coinvestigador 2: Efraín Grisales Ramírez</p>                                                                                                                                                                                                                             |
| <p>Grupo de Investigación en Física y Matemáticas con Énfasis en la Formación de Ingenieros.<br/> Línea: Ingeniería y Tecnología de Materiales</p> <p>2.Grupo de investigación en fitometálica para el estudio de metabolitos secundarios y sus derivados</p> | <p>Evaluación terapéutica de la hipertermia magnética empleando nanopartículas de óxido de hierro con recubrimientos orgánicos/inorgánicos en cáncer de ovario</p> | <p>Investigador Principal: Carlos Alberto Bejarano Casas<br/> Coinvestigador 1 César Leandro Londoño Calderón<br/> Coinvestigador 2: Nury Esperanza Vargas Alejo<br/> Coinvestigador 3: Gladys Angelica Murillo Romero<br/> Coinvestigador 4: Nelson Enrique Arenas Suarez<br/> Coinvestigador 5: Nestor Ivan Cardona Pérez<br/> Coinvestigador 6: Miguel Fernando Molano Cabrejo</p> |

|                                                                                   |                        |                                                     |
|-----------------------------------------------------------------------------------|------------------------|-----------------------------------------------------|
|  | <b>ACTAS DE COMITÉ</b> | <b>CÓDIGO:</b> GIN-FOR-003                          |
|                                                                                   |                        | <b>VERSIÓN:</b> 2                                   |
|                                                                                   |                        | <b>FECHA ELABORACIÓN DEL DOCUMENTO:</b> 09/JUN/2015 |

|                                                                                                                                                                                                                                                                                                                                                                                                                                                                                                                                                                                                                                                      |                                                                                                                                            |
|------------------------------------------------------------------------------------------------------------------------------------------------------------------------------------------------------------------------------------------------------------------------------------------------------------------------------------------------------------------------------------------------------------------------------------------------------------------------------------------------------------------------------------------------------------------------------------------------------------------------------------------------------|--------------------------------------------------------------------------------------------------------------------------------------------|
| <p>Compuestos organometálicos y de coordinación de interés ambiental.</p> <p>3 Grupo de investigación fundamental y aplicada en materiales – GIFAM Línea: Caracterización de materiales utilizando técnicas novedosas.</p> <p>4 Biología celular y funcional e ingeniería de biomoléculas Línea. Biología de Membranas: Canales Iónicos y Modelos de Fisiopatologías</p> <p>5 Grupo de investigación en ciencias biológicas y químicas - GIBIQS<br/>Línea;<br/>Biología Molecular, Funcional y Celular</p> <p>6. Grupo de investigación en salud oral<br/>Línea;<br/>Ingeniería Tisular y Medicina Regenerativa</p> <p>7. Modelado Y Computación</p> | <p>Asistente de investigación 1:<br/>Luis Felipe Gualdrón Moreno</p> <p>Asistente de investigación 2:<br/>Juan Manuel Galindo González</p> |
|------------------------------------------------------------------------------------------------------------------------------------------------------------------------------------------------------------------------------------------------------------------------------------------------------------------------------------------------------------------------------------------------------------------------------------------------------------------------------------------------------------------------------------------------------------------------------------------------------------------------------------------------------|--------------------------------------------------------------------------------------------------------------------------------------------|

|                                                                                   |                        |                                                     |
|-----------------------------------------------------------------------------------|------------------------|-----------------------------------------------------|
|  | <b>ACTAS DE COMITÉ</b> | <b>CÓDIGO:</b> GIN-FOR-003                          |
|                                                                                   |                        | <b>VERSIÓN:</b> 2                                   |
|                                                                                   |                        | <b>FECHA ELABORACIÓN DEL DOCUMENTO:</b> 09/JUN/2015 |

|                                                                                                                                                                                               |                                                                                                                                                         |                                                                                                                                                                                                                                                                                                                                                                 |
|-----------------------------------------------------------------------------------------------------------------------------------------------------------------------------------------------|---------------------------------------------------------------------------------------------------------------------------------------------------------|-----------------------------------------------------------------------------------------------------------------------------------------------------------------------------------------------------------------------------------------------------------------------------------------------------------------------------------------------------------------|
| Científica, línea:<br>Simulación computacional de fenómenos bioquímicos                                                                                                                       |                                                                                                                                                         |                                                                                                                                                                                                                                                                                                                                                                 |
| 1 Diseño Mecánico y Desarrollo Industrial “Archytas”<br><br>2 Física y Matemáticas con énfasis en la formación de Ingenieros<br><br>3 Ciencias Ambientales (INCIAM) – Universidad del Quindío | Evaluación del proceso de extracción de polifenoles a partir del residuo generado en la producción de cacao (Theobroma cacao L)<br>Segunda presentación | Investigador Principal: Cesar Leandro Londoño Calderón<br>Coinvestigador 1: Jenny Paola Ríos Hernández<br>Coinvestigador 2: Diana Yomali Ospina López<br>Coinvestigador 3: Oscar Moscoso Londoño<br>Coinvestigador 4: Daniel Fernando Hincapié Rojas<br>Coinvestigador 5: Henry Reyes Pineda<br>Asistente de investigación 1: estudiante Maestría en Ingeniería |
| Ética y política                                                                                                                                                                              | El lenguaje audiovisual como herramienta de formación de pensamiento crítico para las competencias ciudadanas<br><br>Segunda presentación               | Investigador Principal: Jazmín Muñoz Gálvez<br>Coinvestigador 1: Pablo Cuartas<br>Coinvestigador 2: Marcela María Soto García<br>Coinvestigador 3: León Sigifredo Ciro Ríos                                                                                                                                                                                     |

### DESARROLLO DE LA SESIÓN

1. Lectura del acta 137 (previo envió por correo electrónico) aprobada sin ajustes por todos los integrantes.
2. Presentación de proyectos aprobados en los grupos de investigación o en convocatorias externas

**Se aclara que, los dos proyectos a presentar son con aliados externos, cofinanciados.**

|                                                                                   |                        |                                                     |
|-----------------------------------------------------------------------------------|------------------------|-----------------------------------------------------|
|  | <b>ACTAS DE COMITÉ</b> | <b>CÓDIGO:</b> GIN-FOR-003                          |
|                                                                                   |                        | <b>VERSIÓN:</b> 2                                   |
|                                                                                   |                        | <b>FECHA ELABORACIÓN DEL DOCUMENTO:</b> 09/JUN/2015 |

**Título:** Desarrollo de un sistema de monitoreo y alerta de la calidad del aire y el confort en ambientes escolares

**Grupos de investigación:**

Automática

Física y matemáticas

Financiado por Minciencias

**Investigadores:**

Investigador Principal: Frank Florez Montes

Coinvestigador 1: Manuel Alejandro Tamayo Monsalve

Coinvestigador 2: Efraín Grisales Ramírez

**Presentado por:** Frank Florez Montes

**Presentación:** Proyecto que tiene como objetivo desarrollar un sistema de medición de variables ambientales en espacios escolares que permita ajustar modelos matemáticos y simuladores para estimar la calidad del aire y el confort de los ocupantes.

SE llevará a cabo mediante la siguiente metodología:

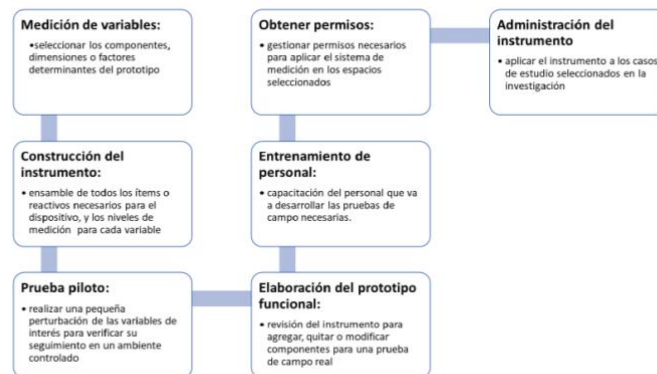

Figura 2: proceso de creación de equipos de medición

**Decisiones:** se propone tener en cuenta la normativa de la EPA de contaminación del aire, revisar las guías de contaminación, el profesor refiere que se ha realizado una revisión exhaustiva para el diseño del prototipo. Además, se refiere sobre el lugar donde se desarrollarán las pruebas y se refiere que están analizando pues son varias variables las que se están revisando. Es un proyecto con enfoque de ASC. Es aprobado.

**Duración:** 12 meses

**Evaluación externa:** Minciencias en convocatoria externa

**Presupuesto:** total

**Aporte UAM:** \$ 36.466.704

**Aporte Minciencias:** 280.000.000

**Código:** 859-138

**Título:** Patrones de aprendizaje: relaciones con aspectos individuales y contextuales

**Grupos de investigación:**

Neuroaprendizaje (UAM)

SEAD (UAM)

|                                                                                   |                        |                                                     |
|-----------------------------------------------------------------------------------|------------------------|-----------------------------------------------------|
|  | <b>ACTAS DE COMITÉ</b> | <b>CÓDIGO:</b> GIN-FOR-003                          |
|                                                                                   |                        | <b>VERSIÓN:</b> 2                                   |
|                                                                                   |                        | <b>FECHA ELABORACIÓN DEL DOCUMENTO:</b> 09/JUN/2015 |

Cognición y Educación (U. de Caldas)  
 Psicología del desarrollo (U. de Manizales)

**Investigadores:**

Investigador: Christian Hederich Martínez  
 Investigador: Angélica María Rodríguez Ortiz  
 Investigador: Valentina Cadavid Álzate  
 Investigador: Diana Marcela Montoya Londoño  
 Investigador: Gloria del Carmen Tobón Vásquez  
 Investigador: Juan Camilo Hernández Rodríguez

**Presentado por:** Christian Hederich Martínez

**Presentación:** proyecto que tiene como objetivo examinar las relaciones entre los patrones de aprendizaje de estudiantes universitarios del área de Manizales, aspectos de personalidad y factores de aula. Se hará recolección en 4 IES de Manizales.

**Decisiones:** Se sugiere revisar la línea base que esta creada en el grupo de permanencia de la UAM. Se podría cruzar con otras características de la UAM. Se le sugiere revisar el diseño muestral. Además, revisar las áreas específicas de salud, ingeniería, y ESE. Este estudio para qué sirve, cómo transformar las prácticas de aula. Revisar el alcance y pasar a estudio correlacional. No se visualizan productos de ASC que acompañen la formación de los docentes. Se sugiere recoger información para estudiantes en modalidad virtual y presencial. El rector refiere que es un buen proyecto que permite aportar a la calidad de la formación e incluso desde los niveles de educación media. Es aprobado.

**Duración:** 12 meses

**Evaluación externa:** No se realizó ya que es un proyecto que ya se ha realizado en varias IES en las que el Dr Christian Hederich ha participado.

**Presupuesto: total 65.328.752**

**UAM: 44.064.752**

**U Nacional: 2.704.000**

**U. de Manizales: 18.560.000**

**Código: 860-138**

**Informe de resultados de 5 años de trabajo colaborativo**

**Título:** Reconstrucción del tejido social en zonas de posconflicto en Colombia.

Colombia científica

Informe de cierre: 5 años de trabajo colaborativo en el marco de una convocatoria nacional con aliados internacionales.

**Grupos de investigación:**

Salud pública

Desarrollo Regional Sostenible

Ética y política

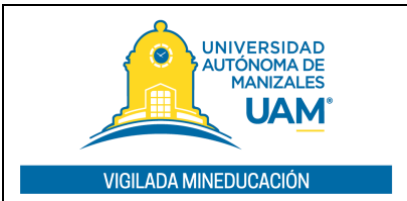

## ACTAS DE COMITÉ

CÓDIGO: GIN-FOR-003

VERSIÓN: 2

FECHA ELABORACIÓN DEL DOCUMENTO: 09/JUN/2015

Empresariado  
Cognición y educación  
En total 30 grupos de investigación en la alianza.

Universidades  
Ucaldas  
Universidad Nacional sede Manizales  
Universidad Tecnológica del Choco  
Universidad de Sucre  
Universidad de Granada  
Universidad Strasbourg  
CINDE  
Codechoco

### Investigadores UAM:

María Eugenia Arango  
Gloria Patricia Castrillón  
Jorge Norvey Álvarez Ríos  
Santiago Quintero  
Marcela Carvajal  
Luis Hernando Barreto  
Adriana Maria Giraldo  
Lida Maritza Gil  
María del Carmen Vergara Q  
Daniel Hurtado Cano  
Lorena Delgado

Presentado por: Marcela Carvajal

### Presentación de los resultados UAM:

|  |                                     |
|--|-------------------------------------|
|  |                                     |
|  | <h3>Resultados específicos UAM</h3> |

**Resultados – Productos de Nuevo Conocimiento**

- 7 Libros
- 22 Capítulos de Libro
- 2 Artículos en A1
- 7 Artículos en B
- 1 Artículos en C
- 4 Publicaciones No especializadas

Total: 30 productos de nuevo conocimiento

Nota: en los libros publicados son autores 1 joven investigador y 5 estudiantes de pregrado

**Resultados – Productos de Nuevo Conocimiento**

- 7 Libros
- 22 Capítulos de Libro
- 2 Artículos en A1
- 7 Artículos en B
- 1 Artículos en C
- 4 Publicaciones No especializadas

Total: 30 productos de nuevo conocimiento

Nota: en los libros publicados son autores 1 joven investigador y 5 estudiantes de pregrado

**Resultados – Formación de investigadores**

- 4 Jóvenes Investigadores
- 68 Estudiantes de Pregrado
- 1 Estudiantes Docto
- 1 Dirección de tesis Doctorado
- 2 Dirección de tesis Maestría

Total personas: 76 investigadores formados

**Resultados – Cursos de formación, ponencias y apoyo a proyectos**

- 8 Diplomados
- 4 Espacios de Participación Ciudadana
- 5 Ponencias en Congresos Internacionales
- 1 Curso de maestría
- 1 Curso de doctorado
- 14 Proyectos comunitarios Acompañados

**Resultados – Productos ASC**

- 6 Cartillas
- 5 PODCAST
- 8 Videos
- 2 Documentales

**Se resalta:**

- El trabajo de campo impactado por la pandemia
- Cambio de enfoques, metodologías, instrumentos para mejorar la comunicación.
- Apatía de las IES de Sucre y Choco

**Conclusiones:**

- La UAM lleva 20 años en PYC, cómo ser más productivos en cada una de las unidades productivas, puede llegar hacer una de las metas de la UAM.
- La pregunta es como impactar a los estudiantes con los aprendizajes adquiridos.

**Título:** Evaluación terapéutica de la hipertermia magnética empleando nanopartículas de óxido de hierro con recubrimientos orgánicos/inorgánicos en cáncer de ovario

**Grupos de investigación:**

Grupo de Investigación en Física y Matemáticas con Énfasis en la Formación de Ingenieros.

Línea: Ingeniería y Tecnología de Materiales

|                                                                                   |                        |                                                     |
|-----------------------------------------------------------------------------------|------------------------|-----------------------------------------------------|
|  | <b>ACTAS DE COMITÉ</b> | <b>CÓDIGO:</b> GIN-FOR-003                          |
|                                                                                   |                        | <b>VERSIÓN:</b> 2                                   |
|                                                                                   |                        | <b>FECHA ELABORACIÓN DEL DOCUMENTO:</b> 09/JUN/2015 |

2. Grupo de investigación en fitometálica para el estudio de metabolitos secundarios y sus derivados Compuestos organometálicos y de coordinación de interés ambiental.

3 Grupo de investigación fundamental y aplicada en materiales – GIFAM Línea: Caracterización de materiales utilizando técnicas novedosas.

4 Biología celular y funcional e ingeniería de biomoléculas Línea. Biología de Membranas: Canales Iónicos y Modelos de Fisiopatologías

5 Grupo de investigación en ciencias biológicas y químicas - GIBIQS Línea; Biología Molecular, Funcional y Celular

6. Grupo de investigación en salud oral Línea; Ingeniería Tisular y Medicina Regenerativa

7. Modelado Y Computación Científica, línea: Simulación computacional de fenómenos bioquímicos

**Investigadores:**

Investigador Principal: Carlos Alberto Bejarano Casas

Coinvestigador 1 César Leandro Londoño Calderón -8 horas semanales

Coinvestigador 2: Nury Esperanza Vargas Alejo

Coinvestigador 3: Gladys Angelica Murillo Romero

Coinvestigador 4: Nelson Enrique Arenas Suarez

Coinvestigador 5: Nestor Ivan Cardona Pérez

Coinvestigador 6: Miguel Fernando Molano Cabrejo

Asistente de investigación 1: Luis Felipe Gualdrón Moreno

Asistente de investigación 2: Juan Manuel Galindo González

**Presentado por:** Coinvestigador 1 César Leandro Londoño Calderón

**Presentación:** proyecto que tiene como objetivo evaluar la viabilidad celular y el efecto terapéutico de las nanopartículas de óxido de hierro con recubrimientos orgánicos/inorgánicos y su funcionalización en la terapia de hipertermia magnética en células de cáncer de ovario cultivadas in vitro.

La síntesis se realizará empleando el método de coprecipitación como se describe a continuación. Se disuelve 516,16 mg de  $FeCl_2 \cdot 4H_2O$  y 1405,07 mg de  $FeCl_3 \cdot 6H_2O$  en agua destilada en un reactor de 250 mL de tres bocas. Posteriormente se agrega en un solo paso una solución acuosa de amoníaco al 25%. Todos los procesos anteriores se llevan a cabo utilizando agitación magnética y un equipo de ultrasonidos. Una vez mezcladas, se dejarán en agitación durante 30 minutos y se separan las nanopartículas mediante decantación asistida magnéticamente y se lavan por triplicado con agua destilada.

Para recubrir las nanopartículas de  $Fe_3O_4$  con APTES y PEG, se agregan 1080 mg de SDS a la suspensión de nanopartículas, posteriormente se añade gota a gota una solución de 4,8 mL de APTES o PEG según el tipo recubrimiento. Todos los procesos

|                                                                                   |                        |                                                     |
|-----------------------------------------------------------------------------------|------------------------|-----------------------------------------------------|
|  | <b>ACTAS DE COMITÉ</b> | <b>CÓDIGO:</b> GIN-FOR-003                          |
|                                                                                   |                        | <b>VERSIÓN:</b> 2                                   |
|                                                                                   |                        | <b>FECHA ELABORACIÓN DEL DOCUMENTO:</b> 09/JUN/2015 |

anteriores se llevarán a cabo utilizando un ultrasonicador. Terminado el goteo se separa el nanocompuesto mediante decantación asistida magnéticamente y se lava repetidamente.

Para funcionalizar el nanocompuesto Fe<sub>3</sub>O<sub>4</sub>@APTES/PEG con el anticuerpo monoclonal bevacizumab, se suspenden 1 mg de Fe<sub>3</sub>O<sub>4</sub>@APTES/PEG en 1 ml Bevacizumab a concentración 0.1 mg/ml y se mantienen en agitación mecánica (1500 RPM) a diferentes intervalos de tiempo (20, 40, 60 y 80 min). Transcurrido los intervalos establecidos, el sistema Fe<sub>3</sub>O<sub>4</sub>@APTES/PEG se sedimenta magnéticamente y posteriormente se mide la densidad óptica del sobrenadante en una longitud de onda de 300 a 650 nm (Merck, Spectroquant® Prove 600) para determinar la concentración de bevacizumab adsorbida por el sistema Fe<sub>3</sub>O<sub>4</sub>@APTES/PEG. La concentración del anticuerpo adsorbido se calcula, como la diferencia entre la concentración inicial del Bevacizumab y la concentración de Bevacizumab del sobrenadante. La concentración del Bevacizumab se calcula con la ecuación de la recta de una curva de calibración previamente realizada. Adicionalmente, se medirá la concentración del anticuerpo utilizando Espectroscopía Infrarroja por Transformada de Fourier.

Para determinar la viabilidad celular en cáncer de útero, se realizará un ensayo MTT para evaluar la citotoxicidad de Fe<sub>3</sub>O<sub>4</sub> y del nanocompuesto Fe<sub>3</sub>O<sub>4</sub>@APTES/PEG, además de evaluar la viabilidad celular del nanocompuesto funcionalizado, esto con el fin de estimar que porcentaje de viabilidad celular presentan todas las nanoestructuras. Todo esto empleando la línea celular de Cáncer de Útero en una placa de 96 pozos en la cual se sembraron 10000 células por pozo y se dejarán incubando durante 24 horas. Posteriormente se aplicarán estímulos y controles con las siguientes condiciones, medio de cultivo estándar, DMSO 5%, Fe<sub>3</sub>O<sub>4</sub>, Fe<sub>3</sub>O<sub>4</sub>@ APTES/PEG, Fe<sub>3</sub>O<sub>4</sub>@ APTES/PEG / Bevacizumab, y células sin estímulos para el control negativo, en distintas concentraciones que irán desde 5 ppm, 25ppm, 50ppm, 100 ppm y 200 ppm (mismas concentraciones puestas para los estímulos). Después de colocar los estímulos se realizarán mediciones a diversas horas que van de 0h, 24h, 48h y 72h, pasados los tiempos correspondientes se adicionará 10 uL de reactivo MTT y se incubará la placa por 4 h. La absorbancia será determinada a una longitud de onda de 570 nm en un lector de microplacas (Corning 96 Well cellBIND).

Las pruebas de hipertermia magnética se llevarán a cabo con la finalidad de conocer la capacidad de calentamiento de las nanopartículas de Fe<sub>3</sub>O<sub>4</sub>@APTES/PEG/Bevacizumab, esto permitirá determinar si estos materiales pueden ser apropiados para hipertermia magnética. Las mediciones se realizarán en un equipo de inducción magnética. Para llevar a cabo las mediciones se prepararán suspensiones con diferentes concentraciones de nanopartículas (4, 6, 8 y 10 mg/ml de agua). Dichas suspensiones serán colocadas en viales de vidrio y posteriormente dispersadas utilizando un baño de ultrasonido, después se llevarán a una incubadora a 36.5 °C por 30 minutos con la finalidad de establecer una misma temperatura inicial para todas las suspensiones. Finalmente, cada una de las muestras será sometida a inducción magnética durante 10 minutos para evaluar su calentamiento.

|                                                                                   |                        |                                                     |
|-----------------------------------------------------------------------------------|------------------------|-----------------------------------------------------|
|  | <b>ACTAS DE COMITÉ</b> | <b>CÓDIGO:</b> GIN-FOR-003                          |
|                                                                                   |                        | <b>VERSIÓN:</b> 2                                   |
|                                                                                   |                        | <b>FECHA ELABORACIÓN DEL DOCUMENTO:</b> 09/JUN/2015 |

**Decisiones:** es aprobado. Se refiere que se ha hecho más pruebas en el diagnóstico y no tanto en tratamiento. El rector refiere que a los investigadores los contactan por su experticia, cómo cuidar los conocimientos. Se sugiere elaborar el protocolo de protección de la información y de PI de todas las IES participantes. Valorar las horas del equipo de pruebas y análisis de pruebas. Se sugiere revisar potencial en el diagnóstico.

**Duración:** 23 meses

**Evaluación externa:** proceso desarrollado en convocatoria interna en la UAN

**Presupuesto: total**

Universidad Antonio Nariño (especie) \$211'604.000

Universidad Antonio Nariño (efectivo) \$76'000.000

Universidad Autónoma de Manizales especie \$62.290.930

Universidad Pedagógica y Tecnológica de Colombia – UPTC (especie) \$36'000.000

Universidad Central (especie) \$11'438.000

Fundación Universitaria de Ciencias de la Salud – FUCS (especie) \$87'847.000

University of Stavanger (especie) \$88'616.000

**Valor total del proyecto: \$ 571'781.000**

**Código:** 861-138

**Título:** Evaluación del proceso de extracción de polifenoles a partir del residuo generado en la producción de cacao (*Theobroma cacao* L)

Segunda presentación

**Grupos de investigación:**

1 Diseño Mecánico y Desarrollo Industrial “Archytas”

2 Física y Matemáticas con énfasis en la formación de Ingenieros

3 Ciencias Ambientales (INCIAM) – Universidad del Quindío

**Investigadores:**

Investigador Principal: Cesar Leandro Londoño Calderón

Coinvestigador 1: Jenny Paola Ríos Hernández (sin tiempo en plan de responsabilidades, es su TD)

Coinvestigador 2: Diana Yomali Ospina López

Coinvestigador 3: Oscar Moscoso Londoño

Coinvestigador 4: Daniel Fernando Hincapié Rojas

Coinvestigador 5: Henry Reyes Pineda

Asistente de investigación: 1 estudiante Maestría en Ingeniería

**Presentado por:** Investigador Principal: Cesar Leandro Londoño Calderón

**Presentación:** proyecto de investigación que tiene como objetivo evaluar el proceso de extracción de fenoles a partir del residuo generado en la producción de cacao (*Theobroma cacao* L). La metodología será la siguiente:

|                                                                                   |                        |                                                     |
|-----------------------------------------------------------------------------------|------------------------|-----------------------------------------------------|
|  | <b>ACTAS DE COMITÉ</b> | <b>CÓDIGO:</b> GIN-FOR-003                          |
|                                                                                   |                        | <b>VERSIÓN:</b> 2                                   |
|                                                                                   |                        | <b>FECHA ELABORACIÓN DEL DOCUMENTO:</b> 09/JUN/2015 |

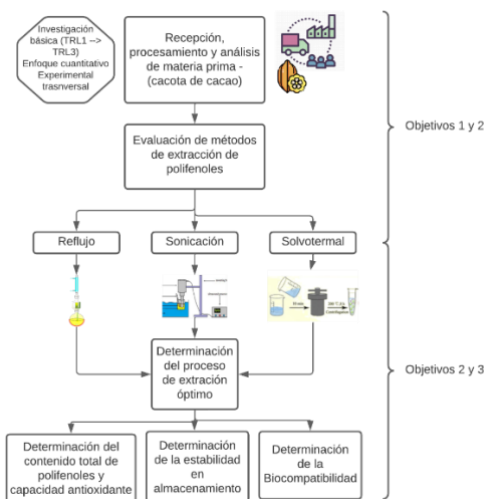

**Decisiones:** se considera que es un proyecto macro, y uno de los entregables es la TD de Yeny, pero no es su tesis. Cuáles son los alcances y productos de cada estudiante vinculado, además dejar claro los derechos de PI de los participantes.

**Duración:** 18 meses

**Evaluación externa:** se presento en la primera fase

**Presupuesto:** total

**Universidad Autónoma de Manizales:** \$116.149.204

**Universidad del Quindío:** \$75.280.000

**Valor total del proyecto:** \$191.429.204

**Código:** 862-138

**Título:** El lenguaje audiovisual como herramienta de formación de pensamiento crítico para las competencias ciudadanas. Segunda presentación

**Grupos de investigación:**

Ética y política

**Investigadores:**

Investigador Principal: Jazmín Muñoz Gálvez

Coinvestigador: Guillermo Alejandro D'abbraccio Kreutzer  
(Universidad Nacional)

Coinvestigador 2: Marcela María Soto García

Coinvestigador 3: León Sigifredo Ciro Rios

**Presentado por:** Investigador Principal: Jazmín Muñoz Gálvez

**Presentación:** proyecto que tiene como objetivo formular una estrategia de formación en alfabetización visual que permita la interpretación del lenguaje audiovisual en contextos de enseñanza, investigación y proyección universitaria.

**Decisiones:** se sugiere revisar teóricamente hay varias categorías de análisis, no hay claridad en la identificación de los recursos y perspectivas, así como la postura para asumir el pensamiento crítico. Definir si el proyecto es de desarrollo o de investigación

|                                                                                   |                        |                                                     |
|-----------------------------------------------------------------------------------|------------------------|-----------------------------------------------------|
|  | <b>ACTAS DE COMITÉ</b> | <b>CÓDIGO:</b> GIN-FOR-003                          |
|                                                                                   |                        | <b>VERSIÓN:</b> 2                                   |
|                                                                                   |                        | <b>FECHA ELABORACIÓN DEL DOCUMENTO:</b> 09/JUN/2015 |

y con ello definir la metodología, se sugiere revisar la información de nuevo y pasar a una próxima sesión. Se propone el equipo de heurística para revisar la propuesta. Y en la próxima sesión participar con el grupo de investigadores autores.

**Duración: 18 meses**

**Evaluación externa:** se evaluó para la primera versión

**Presupuesto: total**

**UAM: 73.430.368**

**UNAL: 43.000.000**

**Código: pendiente de asignación**

**Nota para todos los investigadores que presentan y se les aprueban proyectos en el comité de investigación UAM:** se recuerda a todos los investigadores que, una vez aprobado el proyecto, se comprometen a enviar el acta de compromisos de resultados e impactos antes del día 30 del mes actual y subirla a SIUAM y ajustar los proyectos de acuerdo con las sugerencias en el sistema de investigación UAM. Además, reportar el informe de avance o informe final según los tiempos de ejecución el 30 de junio y el 30 de noviembre. Además, deben subir las cartas de contrapartida que sustentan los aportes de las IES participantes.

Se sugiere que deben presentarse todos los proyectos aprobados en el comité de ética, bioética e integridad científica de la UAM que sesiona todos los segundos y cuartos miércoles de cada mes.

Relatora

María del Carmen Vergara Quintero  
 Coordinadora de la Unidad de Investigación
